# Supplementary material for: Human Omental Mesothelial Cells Impart an Immunomodulatory Landscape Impeding B- and T-Cell Activation
Source: MDPI journal article supplement (doi:10.3390/ijms23115924), 2022-05-25
Supplement: s1 [file s1]

## SUPPLEMENTARY FIGURES

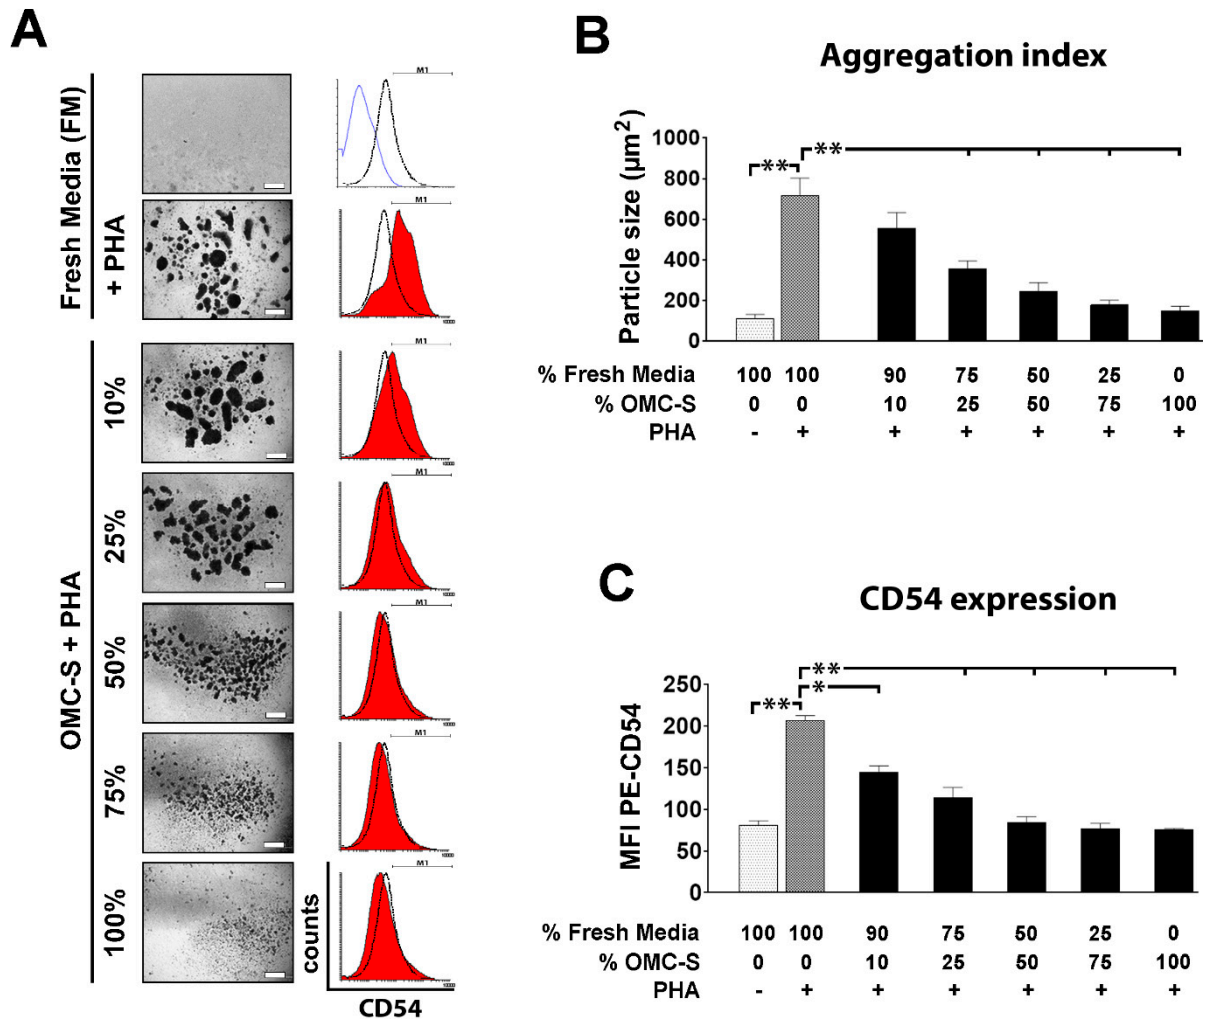

**Figure S1: OMC-derived secretome inhibits PHA-induced agglutination and CD54 expression in mouse lymph nodes lymphocytes.** (A) Left images show representative phase contrast pictures of mouse lymph nodes (LN) lymphocytes cultured for 48h either in fresh media (FM) supplemented or not with 25 μg/ml phytohemagglutinin (PHA). Note, the generation of large lymphocytes aggregates into FM supplemented with PHA. Alternatively, LN lymphocytes were cultured into increased proportions (10 to 100%) of OMC-conditioned media + PHA. Scale bar is 500 μm. Right images show corresponding flow cytometry histogram expression of intercellular adhesion molecule-1 (ICAM-1, CD54). In FM-PHA condition, blue line is for isotype expression. Dashed black line is for CD54 expression in FM-PHA condition, which is shown as reference in all PHA-stimulated conditions. Red filled histogram show CD54 expression. (B) Summary quantification of mean particle size (μm<sup>2</sup>) was performed as a direct measure of lymphocytes agglutination in response to experimental condition. (C) Summary quantification of CD54 mean fluorescent intensity (MFI) at 48h of experimental culture. (B-C) Experiment performed with (n=3) distinct OMC-S batches. Culture conditions are shown in the legend below graphs. Results are mean ± s.e.m. Statistical differences were calculated using ANOVA; \* is for P≤0.05; \*\* is for P≤0.01.

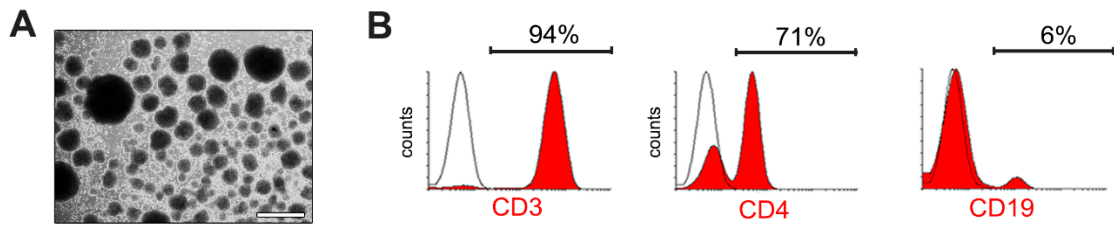

**Figure S2: Characterization of human PBMC-enriched lymphocytes after combined polyclonal activation.** (A) Shows representative aspect of PBMC-enriched lymphocytes subjected to a combined polyclonal CD3/CD28- and PHA-mediated activation (TCR and PHA) and cultured for 6 days. Lymphocytes grew as small to large floating spheroids, scale bar is 500μm. (B) Flow cytometric analysis of day 6 expansion cultures indicated that dissociated lymphocytes corresponded by overall majority to CD3<sup>+</sup> T cells, principally CD4<sup>+</sup> T cells, and also to a minor subpopulation of CD19<sup>+</sup> B cells.

## SUPPLEMENTARY TABLES

**Table S1. List of primary and secondary antibodies**

| ANTIBODY                     | REF     | DILUTION | COMPANY           |
|------------------------------|---------|----------|-------------------|
| Cytokeratin 18               | MAB3234 | 1:200    | Millipore         |
| Wilm's tumor protein 1 (WT1) | M3561   | 1:100    | Dako              |
| β-catenin                    | 9581    | 1:200    | Cell Signalling   |
| Goat anti-mouse AF488        | A11029  | 1:300    | Life Technologies |
| Goat anti-rabbit AF488       | A11034  | 1:300    | Life Technologies |

**Table S2. List of human conjugated antibodies.**

| ANTIBODY                             | DILUTION | REF    | COMPANY |
|--------------------------------------|----------|--------|---------|
| FITC Mouse anti-human CD45           | (1:50)   | 345808 | BD      |
| FITC Mouse anti-human CD31           | (1:50)   | 555445 | BD      |
| FITC Mouse anti-human HLA-DR, DP, DQ | (1:50)   | 555558 | BD      |
| PE Mouse anti-human CD13             | (1:50)   | 347406 | BD      |
| PE Mouse anti-human CD29             | (1:50)   | 555443 | BD      |
| PE Mouse anti-human CD44             | (1:50)   | 550989 | BD      |
| PE Mouse anti-human CD73             | (1:50)   | 550257 | BD      |
| FITC Mouse Anti-Human CD90           | (1:50)   | 555595 | BD      |
| PE Mouse anti-human CD105            | (1:50)   | 560839 | BD      |
| PE Mouse anti-human CD166            | (1:50)   | 559263 | BD      |
| PE Mouse anti-human CD54             | (1:50)   | 560971 | BD      |
| PE Mouse anti-human CD3              | (1:100)  | 555333 | BD      |
| FITC Mouse anti-human CD4            | (1:100)  | 555346 | BD      |
| FITC Mouse anti-human CD8            | (1:100)  | 555366 | BD      |
| FITC Mouse anti-human CD19           | (1:100)  | 555412 | BD      |
| APC Mouse anti-human CD25            | (1:100)  | 561399 | BD      |
| FITC Mouse IgG1, k                   |          | 555748 | BD      |
| FITC Mouse IgG2a,k                   |          | 555573 | BD      |
| FITC Mouse IgG2b,k                   |          | 555742 | BD      |

|                  |  |        |    |
|------------------|--|--------|----|
| PE Mouse IgG1, k |  | 555749 | BD |
|------------------|--|--------|----|

**Table S3. List of mouse conjugated antibodies**

| ANTIBODY                                       | DILUTION | REF    | COMPANY   |
|------------------------------------------------|----------|--------|-----------|
| FITC Rat anti-mouse CD11b                      | 1:100    | 553310 | BD        |
| PE Rat anti-mouse CD54                         | 1:100    | 553253 | BD        |
| PerCP-Cy <sup>TM</sup> Hamster anti-mouse CD80 | 1:100    | 560526 | BD        |
| PE Rat anti-mouse CD86                         | 1:100    | 561963 | BD        |
| PE Rat anti-mouse CD206                        | 1:100    | 141705 | Biolegend |
| BB515 Rat anti-mouse CD25                      | 1:50     | 564424 | BD        |
| FITC Rat anti-mouse CD3                        | 1:50     | 555274 | BD        |
| PE Rat anti-mouse CD4                          | 1:50     | 553049 | BD        |
| PE Rat anti-mouse CD8                          | 1:50     | 553032 | BD        |
| PE Rat anti-mouse CD19                         | 1:100    | 557399 | BD        |
| PerCP-Cy <sup>TM</sup> 5.5 Hamster IgG2, κ     | 1:100    | 560562 | BD        |
| PE Rat IgG2a, k                                | 1:100    | 553930 | BD        |
| BB515 Rat IgG1, λ                              | 1:50     | 564417 | BD        |
| FITC Rat IgG2b, κ Isotype Control              | 1:100    | 553988 | BD        |
| PE Rat IgG2b, k                                | 1:100    | 553989 | BD        |

**Table S4: Composition of adipogenic, chondrogenic and osteogenic differentiation media.**

| Adipogenic medium                                       | Chondrogenic medium                            | Osteogenic medium                           |
|---------------------------------------------------------|------------------------------------------------|---------------------------------------------|
| DMEM low glucose (Gibco)                                | DMEM low glucose (Gibco)                       | DMEM low glucose (Gibco)                    |
| 10 % FBS (Hyclone)                                      | 1 % FBS (Hyclone)                              | 10 % FBS (Hyclone)                          |
| 1% P/S antibiotics (Gibco)                              | 1% P/S antibiotics (Gibco)                     | 1% P/S antibiotics (Gibco)                  |
| 1X ITS (Gibco)                                          | 1X ITS (Gibco)                                 | 10 µM dexamethasone (Sigma; D4902)          |
| 1 µM dexamethasone (Sigma; D4902)                       | 10 ng/ml rec. hum. TGF-β1 (Peprotech; 100-21C) | 50 µg/ml Ascorbic acid (Sigma; A7506)       |
| 250 µM 3-Isobutyl-1-methylxanthine (IBMX; Sigma; I7018) | 50 ng/ml ascorbic acid (Sigma; A7506).         | 10 mM beta-glycerophosphate (Sigma; G9891)  |
| 250 µM indomethacin (Sigma; I7378)                      |                                                |                                             |
| DETECTION DIFFERENTIATION                               |                                                |                                             |
| Oil red (Sigma; O0625)                                  | Alcian blue 8GX (Sigma; A5268)                 | SIGMAFAST BCIP/NBT substrate (Sigma; B5655) |

**Table S5: List of primers used in the study**

| Gene          | Forward (5'---3')       | Reverse (5'---3')        |
|---------------|-------------------------|--------------------------|
| <b>IL-6</b>   | ACTCACCTCTTCAGAACGAATTG | CCATCTTTGGAAGGTTTCAGGTTG |
| <b>TGFβ</b>   | CTAATGGTGGAAACCCACAACG  | TATCGCCAGGAATTGTTGCTG    |
| <b>IL-12a</b> | CCTTGCACTTCTGAAGAGATTGA | ACAGGGCCATCATAAAAGAGGT   |
| <b>COX2</b>   | TAAGTGGGATTGTACCCGGAC   | TTTGTAGCCATAGTCAGCATTGT  |
| <b>CXCL1</b>  | AACCGAAGTCATAGCCACAC    | GTTGGATTTGTCACTGTTTCAGC  |
| <b>IDO</b>    | GCCAGCTTCGAGAAAGAGTTG   | ATCCCAGAACTAGACGTGCAA    |
| <b>ARG1</b>   | TGGACAGACTAGGAATTGGCA   | CCAGTCCGTCAACATCAAACT    |
| <b>IL-5</b>   | TCTACTCATCGAACTCTGCTGA  | CCCTTGCACAGTTTGACTCTC    |
| <b>IL-1β</b>  | ATGATGGCTTATTACAGTGGCAA | GTCGGAGATTTCGTAGCTGGA    |
| <b>iNOS</b>   | TTCAGTATCACAACTCAGCAAG  | TGGACCTGCAAGTTAAATCCC    |
| <b>IL-2</b>   | TCCTGTCTTGCAATTGCACTAAG | CATCCTGGTGAGTTTGGGATTC   |
| <b>IFNγ</b>   | TCGGTAACTGACTTGAATGTCCA | TCGCTTCCCTGTTTTAGCTGC    |
| <b>IL-15</b>  | TTTCAGTGCAGGGCTTCCTAA   | GGGTGAACATCACTTTCCGTAT   |
| <b>IL-4</b>   | ATGGGTCTCACCTCCCACT     | GATGTCTGTTACGGTCAACTCG   |
| <b>TNFα</b>   | CCTCTCTCTAATCAGCCCTCTG  | GAGGACCTGGGAGTAGATGAG    |
| <b>LGALS9</b> | GGGCGCAGACAAAAACCTC     | GGAGTAGAGAACATCTGTCCAGG  |
| <b>IL-10</b>  | TCAAGGCGCATGTGAACTCC    | GATGTCAAACCTCACTCATGGCT  |
| <b>GAPDH</b>  | AGCCACATCGCTCAGACAC     | GCCCAATACGACCAAATCC      |

*Abbreviations:* **IL-6**, interleukin 6; **TGFβ**, transforming growth factor-beta; **IL-12a**, interleukin 12 alpha; **Cox2**, cyclooxygenase-2; **CXCL1**, chemokine (C-X-C motif) ligand 1; **IDO**, Indoleamine-2,3-dioxygenase; **ARG1**, arginase I; **IL-5**, interleukin 5; **IL-1β**, interleukin 1 beta; **iNOS**, inducible nitric oxide synthase; **IL-2**, interleukin 2; **IFNγ**, Interferon gamma; **IL-15**, interleukin 15; **IL-4**, interleukin 4; **TNFα**, tumor necrosis factor alpha; **LGALS9**, galectin 9; **IL-10**, interleukin 10; **GAPDH**, Glyceraldehyde 3-phosphate dehydrogenase.
